# Supplementary material for: NMDA-receptor inhibition and oxidative stress during hippocampal maturation differentially alter parvalbumin expression and gamma-band activity
Source: PubMed Central journal article supplement (PMC6015018; doi:10.1038/s41598-018-27830-2), 2018-06-22
Supplement: 41598_2018_27830_MOESM1_ESM.pdf [file 41598_2018_27830_MOESM1_ESM.pdf]

**Supplementary material for the manuscript “*NMDA-receptor inhibition and oxidative stress during hippocampal maturation differentially alter parvalbumin expression and gamma-band activity*”**

Autors: Luisa A. Hasam-Henderson<sup>1</sup>, Grace C. Gotti<sup>1</sup>, Michele Mishto<sup>3,4</sup> Constantin Klisch<sup>1</sup>, Zoltan Gerevich<sup>1</sup>, Jörg R.P. Geiger<sup>1,2</sup>, Richard Kovács<sup>1\*</sup>

Correspondence to [richard.kovacs@charite.de](mailto:richard.kovacs@charite.de)

### **Supplementary I. Maturation of the electrophysiological properties of adapting and non-adapting interneurons**

Boxplots representing the changes in the electrophysiological properties of adapting and non-adapting YFP-VGAT interneurons depending on the respective age in culture (DIV 2-5, 6-8, 9-11, 12-15, 16-17): **a.** Membrane resistance, **b.** Membrane capacitance, **c.** Frequency of the action potentials upon a 1 s depolarizing step and **d.** Action potential half-width. **e.** The number of recorded cells (165 cells) for both interneuron groups are listed on the right table. These cells were recorded from 70 slices, prepared from 32 animals.

### **Supplementary II. Neuronal and glial monochlorobimane fluorescence pattern and time-dependent changes in oxidized protein levels in organotypic hippocampal slice cultures**

Representative confocal images of the CA3 region of DIV10 (P7) slice cultures stained with monochlorobimane (mBCL) (10  $\mu$ M) in the perfusion, depicting VGAT-YFP interneurons (green) and mBCL (magenta) labelled cells. Note that mBCL fluorescence pattern resembles the distribution of glial cells in slice cultures whereas VGAT-YFP cells were only weakly stained by mBCL. Image stacks were taken with a 20x (upper row, scale bar corresponds to 100  $\mu$ m) or 60x objective (lower row, scale bar corresponds to 20  $\mu$ m). **b.** Representative oxyblot (of 2 independent experiments) of cell lysates of DIV0, 4, 7 14 slice cultures. To control the loading of equal amount of proteins, we performed in parallel a western blot assay on a 12 % SDS-PAGE gel staining the  $\alpha$ 4 subunit of proteasome.

### **Supplementary III. Full length gels corresponding to the figure 3 titled “Effects of NMDAR inhibition, oxidative stress and increased synaptic activity on total GSH content and on protein oxidation levels”**

Representative oxyblot (of 3-4 independent experiments) presenting oxidized protein level in cell lysates at DIV3 (left) and 10 (right) in control and treated slice cultures. Different time exposures were not applied in the presented data. In the figure 3 of the main text, the last gel line was not shown since this treatment was not further addressed in the manuscript.

Supplementary Figure I

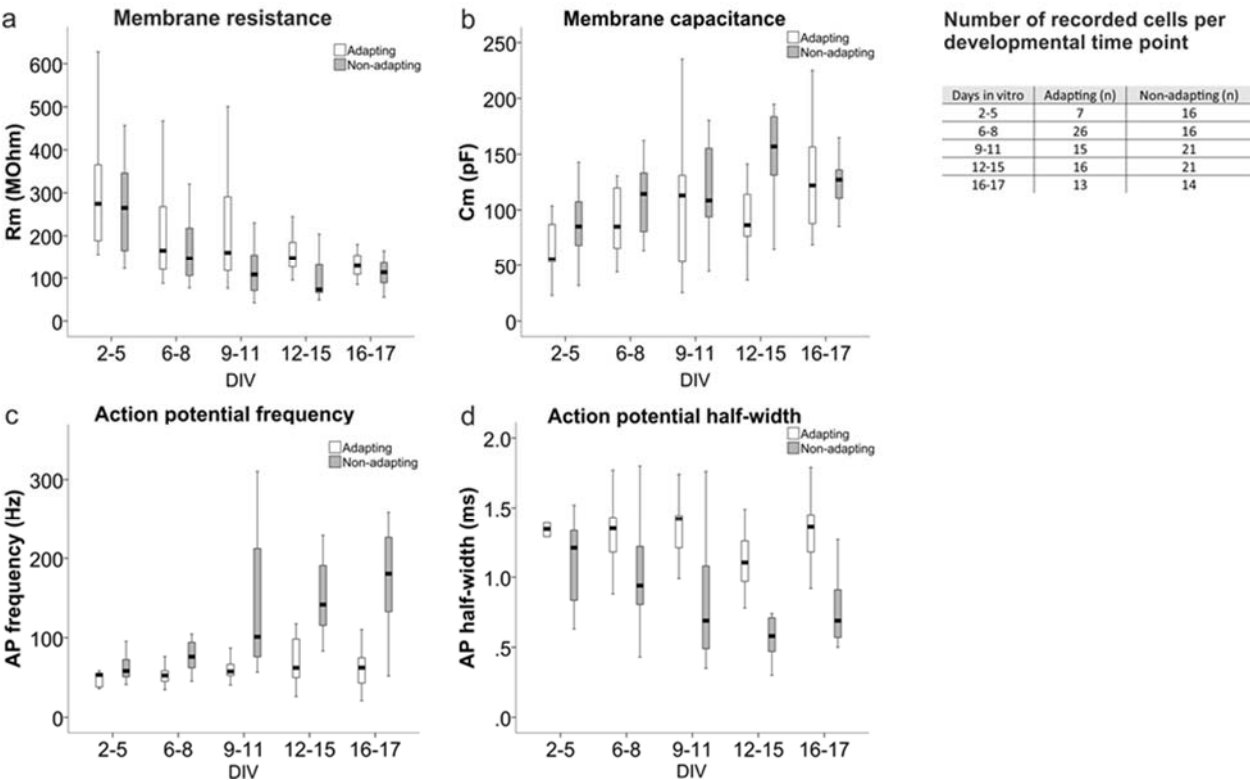

Supplementary Figure II

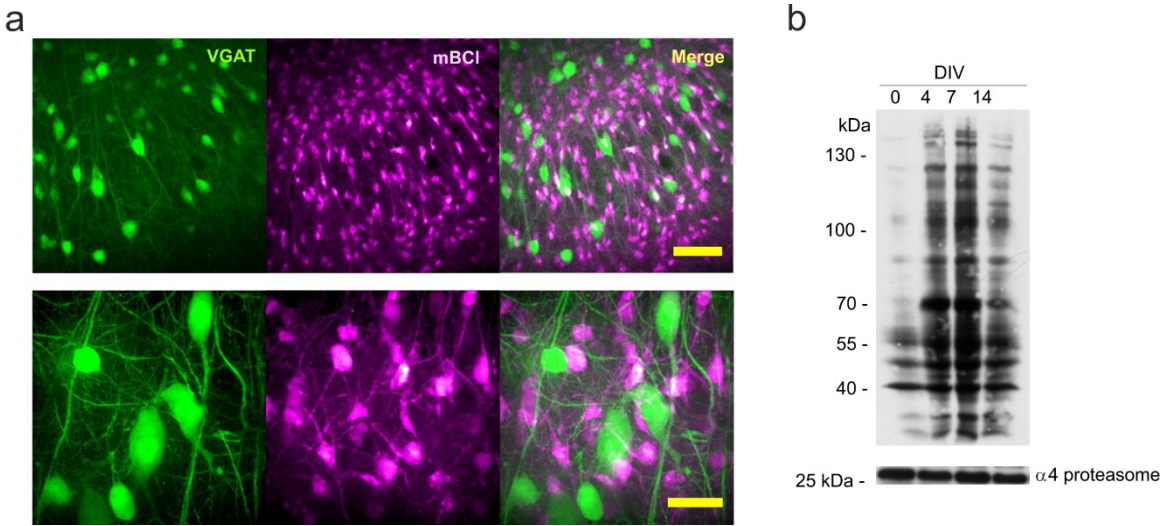

Supplementary Figure III

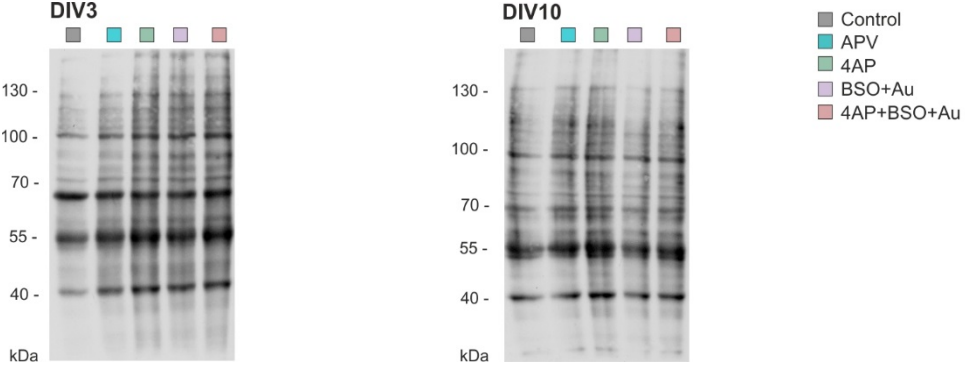

## Descriptive statistics and statistical tests

### Figure 2.

#### Figure 2d. Gamma oscillation frequency

| Slices (n) | DIV   | Median (Hz) | Mean (Hz)   | SEM (Hz)    |
|------------|-------|-------------|-------------|-------------|
| 47         | DIV3  | 31,73       | 31,3682     | 0,54408     |
| 38         | DIV10 | 39,67285156 | 40,00212017 | 0,972733621 |
| 10         | DIV15 | 41,35131836 | 40,98510742 | 1,20195186  |

**Kruskal Wallis Test**  $p = 4,6703 \cdot 10^{-11}$   $H(2) = 47.574$   $df = 2$

#### Mann Whitney U (2 tailed)

| Compared groups | p                           | U     | Z      | N  | r           |
|-----------------|-----------------------------|-------|--------|----|-------------|
| DIV3 vs DIV10   | $p = 5,6252 \cdot 10^{-10}$ | 192,0 | -6,201 | 85 | 0,457705998 |
| DIV3 vs DIV15   | $p = 4,2113 \cdot 10^{-6}$  | 16,0  | -4,601 | 57 | 0,377967822 |
| DIV10 vs DIV15  | $p = 0,454$                 | 160,5 | -,750  | 48 | 0,01195241  |

#### Figure 2e. Gamma oscillation power

| Slices (n) | DIV   | Median ( $\mu V^2$ ) | Mean ( $\mu V^2$ ) | SEM ( $\mu V^2$ ) |
|------------|-------|----------------------|--------------------|-------------------|
| 47         | DIV3  | 1,33635              | 3,217540915        | 0,822984922       |
| 38         | DIV10 | 4,923105             | 51,40300095        | 22,19897095       |
| 10         | DIV15 | 3,059635             | 8,6367301          | 3,859603216       |

**Kruskal Wallis Test**  $p = 0,007$   $H(2) = 9.936$   $df = 2$

#### Mann Whitney U (2 tailed)

| Compared groups | p                          | U     | Z      | N  | r           |
|-----------------|----------------------------|-------|--------|----|-------------|
| DIV3 vs DIV10   | $p = 1,5445 \cdot 10^{-5}$ | 404,0 | -4,322 | 85 | 0,222402555 |
| DIV3 vs DIV15   | $p = 0,036$                | 135,0 | -2,098 | 57 | 0,078608112 |
| DIV10 vs DIV15  | $p = 0,402$                | 157,0 | -,838  | 48 | 0,014932468 |

### Figure 3.

#### Figure 3b left

| Descriptives   |   |       |          |            | Tests of Normality  |       |      |              |       |      |       |
|----------------|---|-------|----------|------------|---------------------|-------|------|--------------|-------|------|-------|
|                | N | Mean  | Std. Dev | Std. Error | Kolmogorov-Smirnova |       |      | Shapiro-Wilk |       |      |       |
|                |   |       |          |            | Statistic           | df    | Sig. | Statistic    | df    | Sig. |       |
| <b>Control</b> | 6 | 100   | 0        | 0          |                     |       |      |              |       |      |       |
| <b>APV</b>     | 5 | 102,8 | 8,66412  | 3,87471    | <b>APV</b>          | 0,322 | 5    | 0,098        | 0,85  | 5    | 0,194 |
| <b>4AP</b>     | 4 | 96,55 | 12,00014 | 6,00007    | <b>4AP</b>          | 0,282 | 4    | .            | 0,939 | 4    | 0,65  |
| <b>BSO/Au</b>  | 4 | 55,3  | 4,32281  | 2,1614     | <b>BSO/Au</b>       | 0,234 | 4    | .            | 0,94  | 4    | 0,653 |

ANOVA  $F(3,15)=40.049$ ,  $p=2.12^{-7}$

| Bonferroni        |               | Mean Difference | Std. Error | Sig.  | 95% Confidence Interval |             |
|-------------------|---------------|-----------------|------------|-------|-------------------------|-------------|
|                   |               |                 |            |       | Lower Bound             | Upper Bound |
| <b>Control vs</b> | <b>APV</b>    | -2,08000        | 4,16746    | 1,000 | -15,4016                | 11,2416     |
|                   | <b>4AP</b>    | 3,45000         | 4,44253    | 1,000 | -10,7509                | 17,6509     |
|                   | <b>BSO/Au</b> | 44,7*           | 4,44253    | ,000  | 30,4991                 | 58,9009     |

\*. The mean difference is significant at the 0.05 level.

#### Figure 3b right

| Descriptives   |   |        |                |            | Tests of Normality  |       |      |              |       |      |       |
|----------------|---|--------|----------------|------------|---------------------|-------|------|--------------|-------|------|-------|
|                | N | Mean   | Std. Deviation | Std. Error | Kolmogorov-Smirnova |       |      | Shapiro-Wilk |       |      |       |
|                |   |        |                |            | Statistic           | df    | Sig. | Statistic    | df    | Sig. |       |
| <b>Control</b> | 7 | 100    | 0              | 0          |                     |       |      |              |       |      |       |
| <b>APV</b>     | 5 | 93     | 14,43295       | 6,45461    | <b>APV</b>          | 0,248 | 5    | 0,2          | 0,887 | 5    | 0,34  |
| <b>4AP</b>     | 4 | 95,425 | 16,18773       | 8,09386    | <b>4AP</b>          | 0,385 | 4    | .            | 0,729 | 4    | 0,024 |
| <b>BSO/Au</b>  | 5 | 72,28  | 8,89028        | 3,97585    | <b>BSO/Au</b>       | 0,236 | 5    | 0,2          | 0,902 | 5    | 0,419 |

ANOVA  $F(3, 17)=7.077$ ,  $p=0.002714$

| Bonferroni        |               | Mean Difference | Std. Error | Sig.  | 95% Confidence Interval |             |
|-------------------|---------------|-----------------|------------|-------|-------------------------|-------------|
|                   |               |                 |            |       | Lower Bound             | Upper Bound |
| <b>Control vs</b> | <b>APV</b>    | 7               | 5,98797    | 1     | -11,7735                | 25,7735     |
|                   | <b>4AP</b>    | 4,575           | 6,40974    | 1     | -15,5209                | 24,6709     |
|                   | <b>BSO/Au</b> | 27,72000*       | 5,98797    | 0,001 | 8,9465                  | 46,4935     |

\*. The mean difference is significant at the 0.05 level.

### Figure 3d left

Descriptives

|                | N | Mean     | Std. Deviation | Std. Error |
|----------------|---|----------|----------------|------------|
| <b>Control</b> | 5 | 100      | 0              | 0          |
| <b>APV</b>     | 4 | 126,825  | 11,52139       | 5,7607     |
| <b>4AP</b>     | 4 | 144,1125 | 19,1449        | 9,57245    |
| <b>BSO/Au</b>  | 3 | 141,2    | 3,95095        | 2,28108    |

Tests of Normality

|               | Kolmogorov-Smirnova |    |      | Shapiro-Wilk |    |       |
|---------------|---------------------|----|------|--------------|----|-------|
|               | Statistic           | df | Sig. | Statistic    | df | Sig.  |
| <b>APV</b>    | 0,258               | 4  | .    | 0,948        | 4  | 0,704 |
| <b>4AP</b>    | 0,271               | 4  | .    | 0,83         | 4  | 0,168 |
| <b>BSO/Au</b> | 0,324               | 3  | .    | 0,877        | 3  | 0,316 |

ANOVA F(3,12)=17.086, p=0.000309

| Bonferroni         |               | Mean Difference | Std. Error | Sig.      | 95% Confidence Interval |             |
|--------------------|---------------|-----------------|------------|-----------|-------------------------|-------------|
|                    |               |                 |            |           | Lower Bound             | Upper Bound |
| <b>Controls vs</b> | <b>APV</b>    | -26,82500*      | 7,41396    | 0,028     | -51,4816                | -2,1684     |
|                    | <b>4AP</b>    | -44,11250*      | 7,41396    | 0,0000355 | -68,7691                | -19,4559    |
|                    | <b>BSO/Au</b> | -41,20000*      | 8,07129    | 0,002     | -68,0427                | -14,3573    |

\*. The mean difference is significant at the 0.05 level.

### Figure 3d right

Descriptives

|         | N | Mean     | Std. Deviation | Std. Error |
|---------|---|----------|----------------|------------|
| Control | 5 | 100      | 0              | 0          |
| APV     | 5 | 112,1    | 26,33458       | 11,77718   |
| 4AP     | 3 | 149,7333 | 40,20526       | 23,21252   |
| BSO/Au  | 3 | 126,5667 | 23,18972       | 13,38859   |

Tests of Normality

|        | Kolmogorov-Smirnova |    |       | Shapiro-Wilk |    |       |
|--------|---------------------|----|-------|--------------|----|-------|
|        | Statistic           | df | Sig.  | Statistic    | df | Sig.  |
| APV    | 0,222               | 5  | ,200* | 0,887        | 5  | 0,343 |
| 4AP    | 0,191               | 3  | .     | 0,997        | 3  | 0,9   |
| BSO/Au | 0,194               | 3  | .     | 0,997        | 3  | 0,888 |

\*. This is a lower bound of the true significance.

ANOVA F(3,12)=2.844, p=0.082389

| Bonferroni        |               | Mean Difference | Std. Error | Sig.  | 95% Confidence Interval |             |
|-------------------|---------------|-----------------|------------|-------|-------------------------|-------------|
|                   |               |                 |            |       | Lower Bound             | Upper Bound |
| <b>Control vs</b> | <b>APV</b>    | -12,1           | 14,36134   | 1     | -59,8614                | 35,6614     |
|                   | <b>4AP</b>    | -49,73333       | 16,58304   | 0,096 | -104,8835               | 5,4168      |
|                   | <b>BSO/Au</b> | -26,56667       | 16,58304   | 1     | -81,7168                | 28,5835     |

## Figure 4

### Figure 4b left

| Number of YFP+ Interneurons per image stack |         |            |          |          |          | Mann Whitney U 2 tailed on the medians |      |        |    |           |
|---------------------------------------------|---------|------------|----------|----------|----------|----------------------------------------|------|--------|----|-----------|
|                                             |         | Slices (n) | Mean     | SEM      | Median   | p                                      | U    | Z      | N  | r         |
| DIV3                                        | Control | 15         | 122,8687 | 9,63425  | 111,7500 | ,659                                   | 74,0 | -,441  | 26 | 0,0077845 |
|                                             | APV     | 11         | 128,8544 | 11,58166 | 113,1818 |                                        |      |        |    |           |
| DIV10                                       | Control | 13         | 76,6039  | 6,23326  | 80,5000  | ,063                                   | 35,0 | -1,861 | 23 | 0,1573427 |
|                                             | APV     | 10         | 62,3585  | 4,13014  | 61,8042  |                                        |      |        |    |           |

### Figure 4b middle

| Number of PV+ Interneurons per image stack |         |            |         |         |         | Mann Whitney U 2 tailed on the medians |      |        |    |           |
|--------------------------------------------|---------|------------|---------|---------|---------|----------------------------------------|------|--------|----|-----------|
|                                            |         | Slices (n) | Mean    | SEM     | Median  | p                                      | U    | Z      | N  | r         |
| DIV3                                       | Control | 15         | 5,4734  | ,40623  | 5,3438  | ,177                                   | 56,5 | -1,350 | 26 | 0,0728599 |
|                                            | APV     | 11         | 4,3319  | ,66509  | 4,5357  |                                        |      |        |    |           |
| DIV10                                      | Control | 13         | 13,3009 | 1,18541 | 11,7500 | ,009                                   | 23,0 | -2,605 | 23 | 0,3083916 |
|                                            | APV     | 10         | 8,5952  | ,64085  | 8,9465  |                                        |      |        |    |           |

### Figure 4b right

| Ratio of YFP+/PV+ interneurons in 3D slice reconstructions |         |            |           |           |           | Mann Whitney U 2 tailed on the medians |      |        |    |           |
|------------------------------------------------------------|---------|------------|-----------|-----------|-----------|----------------------------------------|------|--------|----|-----------|
|                                                            |         | Slices (n) | Mean      | SEM       | Median    | p                                      | U    | Z      | N  | r         |
| DIV3                                                       | Control | 15         | 4,7572    | 0,4874967 | 4,318363  | ,243                                   | 60,0 | -1,168 | 26 | 0,0545455 |
|                                                            | APV     | 11         | 3,4918    | ,47414    | 4,0562    |                                        |      |        |    |           |
| DIV10                                                      | Control | 13         | 17,647925 | 0,9011611 | 16,766039 | ,026                                   | 29,0 | -2,233 | 23 | 0,2265734 |
|                                                            | APV     | 10         | 14,0601   | 1,14856   | 13,0744   |                                        |      |        |    |           |

### Figure 4c. DIV3 Gamma oscillations

|            |              | Frequency   |           |          | Power                |                    |                   |
|------------|--------------|-------------|-----------|----------|----------------------|--------------------|-------------------|
| Slices (n) | DIV          | Median (Hz) | Mean (Hz) | SEM (Hz) | Median ( $\mu V^2$ ) | Mean ( $\mu V^2$ ) | SEM ( $\mu V^2$ ) |
| 47         | DIV3 Control | 31,73       | 31,3682   | 0,54408  | 1,33635              | 3,2175409          | 0,82298492        |
| 14         | DIV3 APV     | 27,1606445  | 27,85818  | 1,044708 | 1,7648               | 6,0086807          | 2,26815236        |

### Mann Whitney U (2 tailed)

|                     |           | p    | U     | Z      | N  | r         |
|---------------------|-----------|------|-------|--------|----|-----------|
| DIV3 Control vs APV | Frequency | ,003 | 157,0 | -2,955 | 61 | 0,457706  |
|                     | Power     | ,320 | 271,0 | -,995  | 61 | 0,0164918 |



### Figure 4e. DIV10 Gamma oscillations

| Slices (n) | DIV           | Frequency   |           |           | Power                |                    |                   |
|------------|---------------|-------------|-----------|-----------|----------------------|--------------------|-------------------|
|            |               | Median (Hz) | Mean (Hz) | SEM (Hz)  | Median ( $\mu V^2$ ) | Mean ( $\mu V^2$ ) | SEM ( $\mu V^2$ ) |
| 38         | DIV10 Control | 39,67285156 | 40,00212  | 0,9727336 | 4,923105             | 51,4030009         | 22,19897095       |
| 20         | DIV10 APV     | 36,62109376 | 35,964966 | 1,2327454 | 0,138525             | 113,592076         | 0,56004521        |

### Mann Whitney U (2 tailed)

|                      |           | p    | U     | Z      | N  | r          |
|----------------------|-----------|------|-------|--------|----|------------|
| DIV10 Control vs APV | Frequency | ,025 | 243,5 | -2,235 | 58 | 0,08763553 |
|                      | Power     | ,326 | 320,0 | -,982  | 58 | 0,0169022  |

**Figure 5.**

**Figure 5b left**

| Number of YFP+ Interneurons per image stack |         |            |          |          |          | Mann Whitney U 2 tailed on the medians |      |        |    |            |
|---------------------------------------------|---------|------------|----------|----------|----------|----------------------------------------|------|--------|----|------------|
|                                             |         | Slices (n) | Mean     | SEM      | Median   | p                                      | U    | Z      | N  | r          |
| DIV3                                        | Control | 15         | 122,8687 | 9,63425  | 111,7500 | ,407                                   | 73,0 | -,830  | 27 | 0,0264652  |
|                                             | BSO/Au  | 12         | 134,6937 | 12,43498 | 128,1353 |                                        |      |        |    |            |
| DIV10                                       | Control | 13         | 76,6039  | 6,23326  | 80,5000  | ,277                                   | 58,0 | -1,088 | 25 | 0,04930966 |
|                                             | BSO/Au  | 12         | 69,2854  | 9,83680  | 59,0977  |                                        |      |        |    |            |

**Figure 5b middle**

| Number of PV+ Interneurons per image stack |         |            |         |         |         | Mann Whitney U 2 tailed on the medians |      |        |    |            |
|--------------------------------------------|---------|------------|---------|---------|---------|----------------------------------------|------|--------|----|------------|
|                                            |         | Slices (n) | Mean    | SEM     | Median  | p                                      | U    | Z      | N  | r          |
| DIV3                                       | Control | 15         | 5,4734  | ,40623  | 5,3438  | ,011                                   | 38,0 | -2,537 | 27 | 0,24761905 |
|                                            | BSO/Au  | 12         | 3,8426  | ,40684  | 4,2294  |                                        |      |        |    |            |
| DIV10                                      | Control | 13         | 13,3009 | 1,18541 | 11,7500 | ,786                                   | 73,0 | -0,272 | 25 | 0,00308185 |
|                                            | BSO/Au  | 12         | 12,8219 | 1,19028 | 11,9344 |                                        |      |        |    |            |

**Figure 5b right**

| Ratio of YFP+/PV+ interneurons in 3D slice reconstructions |         |            |           |            |            | Mann Whitney U 2 tailed on the medians |      |        |    |            |
|------------------------------------------------------------|---------|------------|-----------|------------|------------|----------------------------------------|------|--------|----|------------|
|                                                            |         | Slices (n) | Mean      | SEM        | Median     | p                                      | U    | Z      | N  | r          |
| DIV3                                                       | Control | 15         | 4,7572    | 0,48749669 | 4,31836301 | ,010                                   | 37,0 | -2,586 | 27 | 0,00308185 |
|                                                            | BSO/Au  | 12         | 3,0218    | ,36910     | 2,9805     |                                        |      |        |    |            |
| DIV10                                                      | Control | 13         | 17,647925 | 0,90116107 | 16,7660386 | ,019                                   | 31,0 | -2,346 | 25 | 0,22940559 |
|                                                            | BSO/Au  | 12         | 21,6397   | 1,14088    | 21,6517    |                                        |      |        |    |            |

**Figure 5c. DIV3 Gamma oscillations**

|            |              | Frequency   |           |          | Power                |                    |                   |
|------------|--------------|-------------|-----------|----------|----------------------|--------------------|-------------------|
| Slices (n) | DIV          | Median (Hz) | Mean (Hz) | SEM (Hz) | Median ( $\mu V^2$ ) | Mean ( $\mu V^2$ ) | SEM ( $\mu V^2$ ) |
| 47         | DIV3 Control | 31,73       | 31,3682   | 0,54408  | 1,33635              | 3,2175409          | 0,8229849         |
| 35         | DIV3 BSO/Au  | 30,517578   | 30,142648 | 0,575245 | 2,39368              | 9,1434389          | 2,3914226         |

**Mann Whitney U (2 tailed)**

|                        |           | p    | U     | Z      | N  | r         |
|------------------------|-----------|------|-------|--------|----|-----------|
| DIV3 Control vs BSO/Au | Frequency | ,168 | 675,5 | -1,380 | 82 | 0,0235189 |
|                        | Power     | ,027 | 587,0 | -2,208 | 82 | 0,0601775 |

**Figure 5e. DIV10 Gamma oscillations**

| Slices (n) | DIV           | Frequency   |           |           | Power                |                    |                   |
|------------|---------------|-------------|-----------|-----------|----------------------|--------------------|-------------------|
|            |               | Median (Hz) | Mean (Hz) | SEM (Hz)  | Median ( $\mu V^2$ ) | Mean ( $\mu V^2$ ) | SEM ( $\mu V^2$ ) |
| 38         | DIV10 Control | 39,672852   | 40,00212  | 0,9727336 | 4,923105             | 51,403001          | 22,198971         |
| 19         | DIV10 BSO/Au  | 40,588379   | 40,475946 | 1,6038755 | 7,90862              | 107,24702          | 64,250692         |

**Mann Whitney U (2 tailed)**

|                         |           | p        | U     | Z        | N  | r         |
|-------------------------|-----------|----------|-------|----------|----|-----------|
| DIV10 Control vs BSO/Au | Frequency | ,912     | 354,5 | -0,110   | 57 | 0,0002165 |
|                         | Power     | 0,747730 | 342   | -0,32163 | 57 | 0,2224026 |

**Figure 5g. DIV10 Gamma oscillations**

| Slices (n) | DIV            | Frequency   |           |           | Power                |                    |                   |
|------------|----------------|-------------|-----------|-----------|----------------------|--------------------|-------------------|
|            |                | Median (Hz) | Mean (Hz) | SEM (Hz)  | Median ( $\mu V^2$ ) | Mean ( $\mu V^2$ ) | SEM ( $\mu V^2$ ) |
| 38         | DIV10 Control  | 39,672852   | 40,00212  | 0,9727336 | 4,923105             | 51,403001          | 22,198971         |
| 13         | DIV8-10 BSO/Au | 44,555664   | 42,583759 | 1,8155396 | 5,11695              | 15,192163          | 5,0363188         |

**Mann Whitney U (2 tailed)**

|                                 |           | p         | U     | Z        | N  | r         |
|---------------------------------|-----------|-----------|-------|----------|----|-----------|
| DIV10 Control vs DIV8-10 BSO/Au | Frequency | ,122      | 175,5 | -1,547   | 51 | 0,0478642 |
|                                 | Power     | 0,4891681 | 215   | -0,69163 | 51 | 0,0095671 |

**Figure 6.**

**Figure 6b left**

| Number of YFP+ Interneurons per image stack |         |            |          |            |          | Mann Whitney U 2 tailed on the medians |      |        |    |            |
|---------------------------------------------|---------|------------|----------|------------|----------|----------------------------------------|------|--------|----|------------|
|                                             |         | Slices (n) | Mean     | SEM        | Median   | p                                      | U    | Z      | N  | r          |
| DIV3                                        | Control | 15         | 122,8687 | 9,63425    | 111,7500 | ,023                                   | 34,0 | -2,274 | 25 | 0,21551282 |
|                                             | 4AP     | 10         | 160,2690 | 13,62696   | 163,7538 |                                        |      |        |    |            |
| DIV10                                       | Control | 13         | 76,6039  | 6,23326    | 80,5000  | ,005                                   | 23,0 | -2,810 | 24 | 0,34328975 |
|                                             | 4AP     | 11         | 109,3089 | 8,27164097 | 111,3846 |                                        |      |        |    |            |

**Figure 6b middle**

| Number of PV+ Interneurons per image stack |         |            |         |         |         | Mann Whitney U 2 tailed on the medians |      |        |    |            |
|--------------------------------------------|---------|------------|---------|---------|---------|----------------------------------------|------|--------|----|------------|
|                                            |         | Slices (n) | Mean    | SEM     | Median  | p                                      | U    | Z      | N  | r          |
| DIV3                                       | Control | 15         | 5,4734  | ,40623  | 5,3438  | 1,000                                  | 75,0 | 0,000  | 25 | 0          |
|                                            | 4AP     | 10         | 5,6583  | ,54493  | 5,3287  |                                        |      |        |    |            |
| DIV10                                      | Control | 13         | 13,3009 | 1,18541 | 11,7500 | ,060                                   | 39,0 | -1,883 | 24 | 0,15416039 |
|                                            | 4AP     | 11         | 16,7141 | 1,02088 | 16,7805 |                                        |      |        |    |            |

**Figure 6b right**

| Ratio of YFP+/PV+ interneurons in 3D slice reconstructions |         |            |           |            |            | Mann Whitney U 2 tailed on the medians |      |        |    |            |
|------------------------------------------------------------|---------|------------|-----------|------------|------------|----------------------------------------|------|--------|----|------------|
|                                                            |         | Slices (n) | Mean      | SEM        | Median     | p                                      | U    | Z      | N  | r          |
| DIV3                                                       | Control | 15         | 4,7572    | 0,48749669 | 4,31836301 | ,108                                   | 46,0 | -1,609 | 25 | 0,10782051 |
|                                                            | 4AP     | 10         | 3,7878    | ,53975     | 3,2383     |                                        |      |        |    |            |
| DIV10                                                      | Control | 13         | 17,647925 | 0,90116107 | 16,7660386 | ,369                                   | 56,0 | -0,898 | 24 | 0,03506233 |
|                                                            | 4AP     | 11         | 16,1777   | 1,42967    | 14,8205    |                                        |      |        |    |            |

**Figure 6c. DIV3 Gamma oscillations**

| Slices (n) | DIV          | Frequency   |           |           | Power                |                    |                   |
|------------|--------------|-------------|-----------|-----------|----------------------|--------------------|-------------------|
|            |              | Median (Hz) | Mean (Hz) | SEM (Hz)  | Median ( $\mu V^2$ ) | Mean ( $\mu V^2$ ) | SEM ( $\mu V^2$ ) |
| 47         | DIV3 Control | 31,73       | 31,3682   | 0,54408   | 1,33635              | 3,2175409          | 0,8229849         |
| 15         | DIV3 4AP     | 25,634766   | 27,567546 | 1,0949397 | 1,45013              | 4,2516489          | 1,8913713         |

**Mann Whitney U (2 tailed)**

|                     | p         | U        | Z     | N        | r  |           |
|---------------------|-----------|----------|-------|----------|----|-----------|
| DIV3 Control vs 4AP | Frequency | ,005     | 183,5 | -2,783   | 62 | 0,1269649 |
|                     | Power     | 0,675109 | 327   | -0,41914 | 62 | 0,0028801 |

**Figure 6e. DIV10 Gamma oscillations**

| Slices (n) | DIV           | Frequency   |           |           | Power                |                    |                   |
|------------|---------------|-------------|-----------|-----------|----------------------|--------------------|-------------------|
|            |               | Median (Hz) | Mean (Hz) | SEM (Hz)  | Median ( $\mu V^2$ ) | Mean ( $\mu V^2$ ) | SEM ( $\mu V^2$ ) |
| 38         | DIV10 Control | 39,672852   | 40,00212  | 0,9727336 | 4,923105             | 51,403001          | 22,198971         |
| 20         | DIV10 4AP     | 40,893555   | 41,33606  | 1,4798045 | 13,54435             | 45,314111          | 25,237672         |

**Mann Whitney U (2 tailed)**

|                             | p         | U     | Z       | N  | r         |
|-----------------------------|-----------|-------|---------|----|-----------|
| <b>DIV10 Control vs 4AP</b> |           |       |         |    |           |
| <b>Frequency</b>            | ,539      | 342,5 | -0,614  | 58 | 0,0066128 |
| <b>Power</b>                | 0,3596112 | 324   | -0,9161 | 58 | 0,0147237 |
